# Supplementary material
Source: Springer Nature journal article supplement (https://www.springermedizin.de/resource/supplementary/13058_2010_2596_MOESM3_ESM.pdf/9701780)

**A**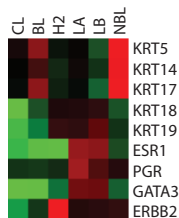

Luminal Gene Cluster

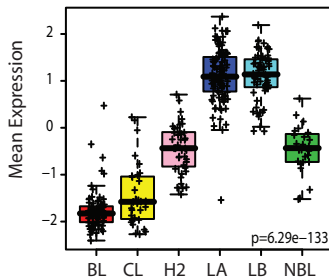

Proliferation Gene Cluster

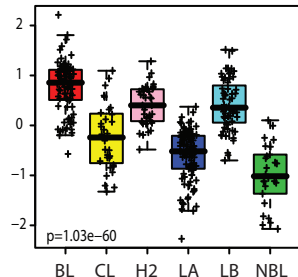**B**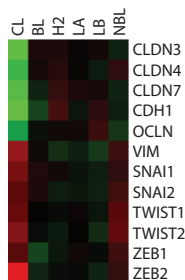

Stromal genes

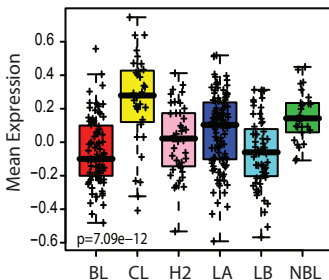

CD8T-Lymphoid genes

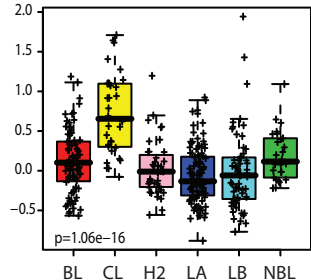**C**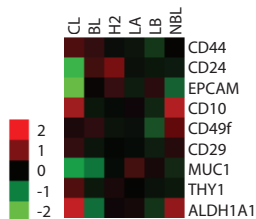

TICs up genes

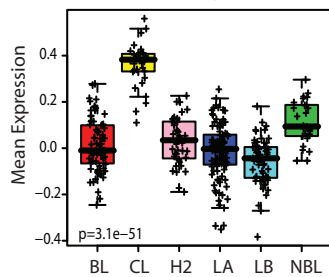

TICs down genes

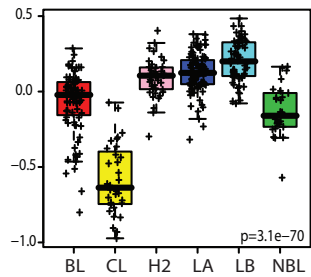

Supplement: MOESM3 [file 9701780]
